# Supplementary material for: Tipping points of ancient Japanese Jomon trade networks from social network analyses of obsidian artifacts
Source: Frontiers journal article supplement (doi:10.3389/fphy.2022.1015870), 2023-01-05
Supplement: Table_1.xlsx [file Table_1.xlsx]

## Sheet: Table1_Supplementary table
Supplementary table Total number and composition ratio of obsidian by provenance in clusters and single sites in each period category.
Period	Cluster ID	Site Name	Site Number	(1) Takahara-yama	(2) Wada-toge	(3) Omegura	(4) Suwa	(5) Tateshina	(6) Kozu-shima	(7) Hakone	(8) Amagi	Total	Memo
1 The beginning and earlier Jomon	No Cluster	-	12	8 (9.1%)	17 (19.3%)	0 (0%)	12 (13.6%)	0 (0%)	48 (54.5%)	3 (3.4%)	0 (0%)	88	Excluded from analyses as noise
	B1	-	7	1 (1.1%)	1 (1.1%)	0 (0%)	2 (2.2%)	9 (9.8%)	65 (70.7%)	7 (7.6%)	7 (7.6%)	92
	B2	-	7	0 (0%)	2 (0.3%)	0 (0%)	27 (4.5%)	0 (0%)	544 (91.4%)	15 (2.5%)	7 (1.2%)	595
	B3	-	4	0 (0%)	2 (22.2%)	0 (0%)	1 (11.1%)	0 (0%)	6 (66.7%)	0 (0%)	0 (0%)	9	Excluded from analyses because less than 30
	B4	-	3	0 (0%)	3 (10%)	0 (0%)	24 (80%)	0 (0%)	3 (10%)	0 (0%)	0 (0%)	30
	B5	-	10	2 (1.3%)	28 (18.7%)	17 (11.3%)	41 (27.3%)	12 (8%)	46 (30.7%)	4 (2.7%)	0 (0%)	150
	B6	-	3	0 (0%)	1 (25%)	0 (0%)	0 (0%)	0 (0%)	3 (75%)	0 (0%)	0 (0%)	4	Excluded from analyses because less than 30
	b7	Miyanomae-minami	1	0 (0%)	0 (0%)	0 (0%)	0 (0%)	0 (0%)	39 (100%)	0 (0%)	0 (0%)	39	Included in analyses because more than 30
	b8	Izumi	1	0 (0%)	0 (0%)	0 (0%)	0 (0%)	0 (0%)	84 (98.8%)	0 (0%)	1 (1.2%)	85
	b9	Ikegami-maehata	1	0 (0%)	0 (0%)	0 (0%)	0 (0%)	0 (0%)	115 (72.8%)	1 (0.6%)	42 (26.6%)	158
	b10	Shiroi-juni	1	0 (0%)	106 (79.7%)	0 (0%)	26 (19.5%)	0 (0%)	1 (0.8%)	0 (0%)	0 (0%)	133
	b11	Tobinodai-kaizuka	1	2 (6.5%)	5 (16.1%)	0 (0%)	3 (9.7%)	2 (6.5%)	17 (54.8%)	2 (6.5%)	0 (0%)	31
	b12	Tateno	1	0 (0%)	0 (0%)	0 (0%)	0 (0%)	1 (3.3%)	29 (96.7%)	0 (0%)	0 (0%)	30
2 The early Jomon	No Cluster	-	16	7 (4.4%)	34 (21.4%)	5 (3.1%)	10 (6.3%)	2 (1.3%)	96 (60.4%)	3 (1.9%)	2 (1.3%)	159	Excluded from analyses as noise
	E1	-	8	1 (0.5%)	137 (66.8%)	10 (4.9%)	56 (27.3%)	1 (0.5%)	0 (0%)	0 (0%)	0 (0%)	205
	E2	-	8	7 (1.2%)	49 (8.1%)	2 (0.3%)	475 (78.8%)	68 (11.3%)	2 (0.3%)	0 (0%)	0 (0%)	603
	E3	-	6	0 (0%)	75 (68.8%)	0 (0%)	33 (30.3%)	1 (0.9%)	0 (0%)	0 (0%)	0 (0%)	109
	E4	-	5	0 (0%)	10 (38.5%)	2 (7.7%)	5 (19.2%)	0 (0%)	9 (34.6%)	0 (0%)	0 (0%)	26	Excluded from analyses because less than 30
	E5	-	5	2 (1.3%)	9 (5.8%)	0 (0%)	27 (17.5%)	0 (0%)	115 (74.7%)	1 (0.6%)	0 (0%)	154
	E6	-	4	1 (1.9%)	4 (7.5%)	0 (0%)	29 (54.7%)	1 (1.9%)	17 (32.1%)	1 (1.9%)	0 (0%)	53
	E7	-	5	0 (0%)	2 (0.3%)	0 (0%)	47 (7.9%)	2 (0.3%)	499 (83.7%)	19 (3.2%)	27 (4.5%)	596
	e8	Shimoterao-nishikata-A	1	0 (0%)	1 (0.2%)	0 (0%)	1 (0.2%)	0 (0%)	631 (99.7%)	0 (0%)	0 (0%)	633	Included in analyses because more than 30
	e9	Yotsuba-chiku	1	0 (0%)	4 (1.5%)	0 (0%)	165 (62.3%)	1 (0.4%)	45 (17%)	50 (18.9%)	0 (0%)	265
	e10	Itoi-miyamae	1	0 (0%)	2 (2.5%)	0 (0%)	77 (97.5%)	0 (0%)	0 (0%)	0 (0%)	0 (0%)	79
	e11	Kurawa	1	0 (0%)	0 (0%)	0 (0%)	0 (0%)	0 (0%)	489 (100%)	0 (0%)	0 (0%)	489
	e12	Higashiya	1	3 (2.8%)	0 (0%)	72 (66.7%)	27 (25%)	0 (0%)	6 (5.6%)	0 (0%)	0 (0%)	108
3 The middle Jomon	No Cluster	-	14	6 (4.9%)	10 (8.1%)	5 (4.1%)	47 (38.2%)	20 (16.3%)	35 (28.5%)	0 (0%)	0 (0%)	123	Excluded from analyses as noise
	M1	-	15	62 (2.4%)	32 (1.3%)	2 (0.1%)	224 (8.8%)	5 (0.2%)	2199 (86.8%)	5 (0.2%)	4 (0.2%)	2533
	M2	-	73	0 (0%)	137 (1.9%)	10 (0.1%)	2050 (28.8%)	45 (0.6%)	4495 (63.2%)	337 (4.7%)	43 (0.6%)	7117
	M3	-	7	0 (0%)	16 (15.1%)	1 (0.9%)	83 (78.3%)	1 (0.9%)	5 (4.7%)	0 (0%)	0 (0%)	106
	M4	-	16	6 (0.5%)	8 (0.7%)	2 (0.2%)	22 (1.9%)	0 (0%)	1134 (96.7%)	0 (0%)	1 (0.1%)	1173
	M5	-	7	0 (0%)	4 (7.8%)	0 (0%)	22 (43.1%)	1 (2%)	23 (45.1%)	1 (2%)	0 (0%)	51
	M6	-	3	3 (4.5%)	1 (1.5%)	0 (0%)	3 (4.5%)	0 (0%)	60 (89.6%)	0 (0%)	0 (0%)	67
	M7	-	3	0 (0%)	0 (0%)	0 (0%)	28 (30.4%)	1 (1.1%)	63 (68.5%)	0 (0%)	0 (0%)	92
	m8	Awashimadai	1	0 (0%)	0 (0%)	0 (0%)	2 (5.4%)	0 (0%)	35 (94.6%)	0 (0%)	0 (0%)	37	Included in analyses because more than 30
	m9	Terano-higashi	1	13 (20%)	4 (6.2%)	1 (1.5%)	12 (18.5%)	1 (1.5%)	34 (52.3%)	0 (0%)	0 (0%)	65
	m10	Odawara-jyo-hachiman-kokaku	1	0 (0%)	0 (0%)	0 (0%)	39 (12%)	0 (0%)	284 (87.4%)	1 (0.3%)	1 (0.3%)	325
	m11	Saihiro-kaizuka	1	0 (0%)	4 (12.1%)	0 (0%)	12 (36.4%)	0 (0%)	16 (48.5%)	0 (0%)	1 (3%)	33
	m12	Nishida	1	22 (59.5%)	0 (0%)	0 (0%)	0 (0%)	0 (0%)	15 (40.5%)	0 (0%)	0 (0%)	37
	m13	Kurawa	1	0 (0%)	0 (0%)	0 (0%)	0 (0%)	0 (0%)	489 (100%)	0 (0%)	0 (0%)	489
	m14	Oishi-yama	1	0 (0%)	0 (0%)	0 (0%)	0 (0%)	0 (0%)	41 (100%)	0 (0%)	0 (0%)	41
	m15	Ochikaito	1	0 (0%)	0 (0%)	0 (0%)	27 (65.9%)	0 (0%)	14 (34.1%)	0 (0%)	0 (0%)	41
	m16	Tsuboi	1	0 (0%)	45 (7.1%)	4 (0.6%)	587 (92.3%)	0 (0%)	0 (0%)	0 (0%)	0 (0%)	636
	m17	Aburatsubo	1	0 (0%)	2 (0.6%)	0 (0%)	165 (51.4%)	2 (0.6%)	151 (47%)	0 (0%)	1 (0.3%)	321
	m18	Okadaira-kaizuka	1	0 (0%)	0 (0%)	0 (0%)	0 (0%)	0 (0%)	53 (100%)	0 (0%)	0 (0%)	53
4 The late Jomon	No Cluster	-	11	5 (3.2%)	37 (23.6%)	13 (8.3%)	60 (38.2%)	6 (3.8%)	20 (12.7%)	15 (9.6%)	1 (0.6%)	157	Excluded from analyses as noise
	L1	-	6	1 (0.6%)	47 (28.7%)	0 (0%)	109 (66.5%)	1 (0.6%)	5 (3%)	1 (0.6%)	0 (0%)	164
	L2	-	7	0 (0%)	68 (6.1%)	4 (0.4%)	400 (35.7%)	3 (0.3%)	349 (31.2%)	281 (25.1%)	14 (1.3%)	1119
	L3	-	6	11 (6.7%)	70 (42.4%)	1 (0.6%)	74 (44.8%)	1 (0.6%)	7 (4.2%)	0 (0%)	1 (0.6%)	165
	L4	-	7	6 (3.6%)	20 (11.9%)	0 (0%)	44 (26.2%)	5 (3%)	92 (54.8%)	0 (0%)	1 (0.6%)	168
	L5	-	4	0 (0%)	12 (9.5%)	1 (0.8%)	83 (65.9%)	1 (0.8%)	25 (19.8%)	1 (0.8%)	3 (2.4%)	126
	L6	-	6	1 (0.7%)	15 (10.2%)	0 (0%)	103 (70.1%)	3 (2%)	21 (14.3%)	0 (0%)	4 (2.7%)	147
	L7	-	4	150 (51.2%)	29 (9.9%)	0 (0%)	75 (25.6%)	1 (0.3%)	36 (12.3%)	1 (0.3%)	1 (0.3%)	293
	l8	Oshidashi	1	0 (0%)	1 (2.9%)	0 (0%)	34 (97.1%)	0 (0%)	0 (0%)	0 (0%)	0 (0%)	35	Included in analyses because more than 30
	l9	Shimotakabora	1	0 (0%)	0 (0%)	0 (0%)	0 (0%)	0 (0%)	36 (100%)	0 (0%)	0 (0%)	36
	l10	Sekiba	1	1 (0.6%)	91 (56.5%)	1 (0.6%)	67 (41.6%)	1 (0.6%)	0 (0%)	0 (0%)	0 (0%)	161
	l11	Terano-higashi	1	26 (45.6%)	5 (8.8%)	0 (0%)	10 (17.5%)	0 (0%)	16 (28.1%)	0 (0%)	0 (0%)	57
	l12	Kanbatake	1	44 (57.9%)	7 (9.2%)	2 (2.6%)	22 (28.9%)	0 (0%)	1 (1.3%)	0 (0%)	0 (0%)	76
	l13	Saihiro-kaizuka	1	55 (11.8%)	57 (12.2%)	0 (0%)	126 (27%)	0 (0%)	225 (48.3%)	1 (0.2%)	2 (0.4%)	466
	l14	Ishikamidai	1	0 (0%)	1 (2.2%)	6 (13%)	6 (13%)	0 (0%)	33 (71.7%)	0 (0%)	0 (0%)	46
	l15	Tawara	1	0 (0%)	0 (0%)	0 (0%)	0 (0%)	0 (0%)	47 (100%)	0 (0%)	0 (0%)	47
5 The last Jomon	No Cluster	-	5	1 (1.8%)	11 (19.6%)	1 (1.8%)	29 (51.8%)	2 (3.6%)	12 (21.4%)	0 (0%)	0 (0%)	56	Excluded from analyses as noise
	T1	-	3	0 (0%)	0 (0%)	0 (0%)	59 (93.7%)	0 (0%)	0 (0%)	0 (0%)	4 (6.3%)	63
	T2	-	3	0 (0%)	5 (6%)	0 (0%)	63 (75.9%)	1 (1.2%)	10 (12%)	0 (0%)	4 (4.8%)	83
	T3	-	3	1 (1.1%)	21 (22.8%)	0 (0%)	69 (75%)	0 (0%)	1 (1.1%)	0 (0%)	0 (0%)	92
	T4	-	3	1 (4.2%)	11 (45.8%)	0 (0%)	9 (37.5%)	0 (0%)	2 (8.3%)	0 (0%)	1 (4.2%)	24	Excluded from analyses because less than 30
	t5	Sagetomiyamae	1	73 (46.5%)	17 (10.8%)	0 (0%)	36 (22.9%)	1 (0.6%)	28 (17.8%)	1 (0.6%)	1 (0.6%)	157	Included in analyses because more than 30
	t6	Shimotakabora	1	0 (0%)	0 (0%)	0 (0%)	0 (0%)	0 (0%)	139 (92.1%)	0 (0%)	12 (7.9%)	151
	t7	Sekiba	1	1 (0.6%)	91 (56.5%)	1 (0.6%)	67 (41.6%)	1 (0.6%)	0 (0%)	0 (0%)	0 (0%)	161
	t8	Kanbatake	1	44 (57.9%)	7 (9.2%)	2 (2.6%)	22 (28.9%)	0 (0%)	1 (1.3%)	0 (0%)	0 (0%)	76
	t9	Saihiro-kaizuka	1	17 (26.6%)	10 (15.6%)	1 (1.6%)	17 (26.6%)	0 (0%)	19 (29.7%)	0 (0%)	0 (0%)	64
	t10	Chiamigaido	1	0 (0%)	7 (7.8%)	0 (0%)	81 (90%)	0 (0%)	2 (2.2%)	0 (0%)	0 (0%)	90
	t11	Nakagurisutakigawa-2	1	1 (3.3%)	3 (10%)	1 (3.3%)	22 (73.3%)	3 (10%)	0 (0%)	0 (0%)	0 (0%)	30
	t12	Tawara	1	0 (0%)	0 (0%)	0 (0%)	0 (0%)	0 (0%)	180 (100%)	0 (0%)	0 (0%)	180
	t13	Baba-iseki-dai-5-chiten	1	90 (68.2%)	13 (9.8%)	0 (0%)	24 (18.2%)	0 (0%)	5 (3.8%)	0 (0%)	0 (0%)	132
	t14	Hirasawadomei	1	0 (0%)	6 (1.7%)	0 (0%)	248 (69.9%)	0 (0%)	29 (8.2%)	10 (2.8%)	62 (17.5%)	355
